# Supplementary material
Source: Research Square preprint supplement (doi:10.21203/rs.3.rs-9368736/v1)
Supplement: Supplementary file 1 [file 5b7ecf5d73c81ee45a94b188.docx]

**Supplementary file**

[**Table S1. Comparison of the lab parameters across the treatment group** 3](#_Toc177049147)

[**Table S2. Comparison of the adverse drug reaction between the treatment groups** 3](#_Toc177049148)

[**Table S3. Association of the treatment group with the primary and secondary outcomes** 4](#_Toc177049149)

[**Figure S1. Comparison of the pain score between the treatment group based on mean difference from the baseline** 4](#_Toc177049660)

**Table S1. Comparison of the lab parameters across the treatment group**

|  | **Treatment group** | | **P-value** |
| --- | --- | --- | --- |
| **NSAID** | **Opioid** |
| **Mean ± SD** | **Mean ± SD** |
| WBC | 11007.23 ± 4732.97 | 13906.67 ± 5663.22 | 0.03 |
| CRP | 30.98 ± 52.32 | 21.62 ± 20.27 | 0.53 |
| Blood glucose | 150.52 ± 76.29 | 131.84 ± 76.96 | 0.47 |
| AST | 123.58 ± 107.92 | 212.42 ± 189.04 | 0.18 |
| Lipase | 1448.02 ± 1042.79 | 1083.79 ± 722.45 | 0.14 |
| Amylase | 1521.25 ± 1098.04 | 1313.82 ± 846.72 | 0.43 |
| Serum calcium | 8.72 ± 0.74 | 8.10 ± 1.19 | 0.07 |
| Serum LDH | 220.64 ± 98.18 | 584.33 ± 479.97 | 0.02 |
| Serum Hematocrit | 36.53 ± 4.85 | 37.32 ± 6.04 | 0.60 |

White Blood Cell count (WBC): 10⁹/L (cells per liter), C-reactive protein (CRP): mg/L, (milligrams per liter), Blood glucose: mmol/L (millimoles per liter), Aspartate aminotransferase (AST): U/L (units per liter), Lipase: U/L (units per liter), Amylase: U/L (units per liter), Serum calcium: mmol/L (millimoles per liter), Serum lactate dehydrogenase (LDH): U/L (units per liter)

Serum hematocrit: % (percentage)

**Table S2. Comparison of the adverse drug reaction between the treatment groups**

|  | | **Treatment group** | | **P-value** |
| --- | --- | --- | --- | --- |
| **NSAID** | **Opioid** |
| **N (%)** | **N (%)** |
| Nausea and Vomiting | Yes | 8 (26.7) | 10 (33.3) | 0.57 |
| No | 22 (73.3) | 20 (66.7) |
| Epigastric Pain | Yes | 3 (10.0) | 9 (30.0) | 0.04 |
| No | 27 (90.0) | 21 (70.0) |
| Allergic reaction | Yes | 0 (0.0) | 2 (6.7) | 0.15 |
| No | 30 (100.0) | 28 (93.3) |
| Constipation | Yes | 5 (16.7) | 4 (13.3) | 0.71 |
| No | 25 (83.3) | 26 (86.7) |
| Sedation | Yes | 11 (36.7) | 19 (63.3) | 0.03 |
| No | 19 (63.3) | 11 (36.7) |
| Fluid retention/Swelling | Yes | 0 (0.0) | 1 (3.3) | 0.31 |
| No | 30 (100.0) | 29 (96.7) |
| Respiratory depression | Yes | 1 (3.3) | 0 (0.0) | 0.33 |
| No | 29 (96.7) | 30 (100.0) |
| Urinary retention | Yes | 0 (0.0) | 0 (0.0) | - |
| No | 30 (100.0) | 30 (100.0) |

**Table S3. Association of the treatment groups with the primary and secondary outcomes**

|  | **NSAID** | | | **Opioid** | | |
| --- | --- | --- | --- | --- | --- | --- |
| Pain score at | Coefficient | 95% CI | P -value | Coefficient | 95% CI | P -value |
| 2hr | 0.16 | -0.70 – 1.03 | 0.70 | -0.33 | -1.49 – 0.82 | 0.56 |
| 6hr | 0.06 | -1.18 – 1.32 | 0.91 | 0.10 | -0.97 – 1.17 | 0.85 |
| 8hr | -0.03 | -1.29 – 1.22 | 0.95 | 0.20 | -0.93 – 1.33 | 0.27 |
| 24hr | -0.10 | -1.18 – 0.98 | 0.85 | 0.26 | -0.78 – 1.31 | 0.50 |
| PSS | 0.03 | -0.48 – 0.55 | 0.89 | -0.03 | -0.55 – 0.48 | 0.89 |
| LOS | -0.83 | -3.43 – 1.71 | 0.52 | 0.83 | -1.77 – 3.43 | 0.52 |

PSS - Patient satisfaction Score, LOS – length of stay

**Figure S1. Comparison of the pain score between the treatment group based on mean difference from the baseline**
